# Supplementary material
Source: HighWire-hosted journal article supplement (https://gut.bmj.com/content/71/7/1266)
Supplement: inline-supplementary-material-2 [file inline-supplementary-material-2.pdf]

**Supplementary table 1.** Metadata for 12 patients to compare microbiota composition between gastric tissue and gastric fluid.

|                 | Gastric cancer<br>(n = 6) | Dysplasia<br>(n = 6) | <i>P</i> value |
|-----------------|---------------------------|----------------------|----------------|
| Age, years      | 62.5 ± 16.8               | 56.7 ± 4.8           | 0.445          |
| Gender          |                           |                      | 1.000          |
| male            | 4 (66.7%)                 | 3 (50.0%)            |                |
| female          | 2 (33.3%)                 | 3 (50.0%)            |                |
| CLO test        |                           |                      | 1.000          |
| negative        | 3 (50.0%)                 | 2 (33.3%)            |                |
| positive        | 3 (50.0%)                 | 4 (66.7%)            |                |
| Hp.IgG          |                           |                      | 1.000          |
| negative        | 1 (16.7%)                 | 1 (16.7%)            |                |
| positive        | 5 (83.3%)                 | 5 (83.3%)            |                |
| Diagnosis       |                           |                      | 0.007          |
| AMD             | 2 (33.3%)                 | 0 (0.0%)             |                |
| AWD             | 4 (66.7%)                 | 0 (0.0%)             |                |
| HGD             | 0 (0.0%)                  | 1 (16.7%)            |                |
| LGD             | 0 (0.0%)                  | 5 (83.3%)            |                |
| Pepsinogen I    | 77.4 ± 34.6               | 38.6 ± 21.2          | 0.041          |
| Pepsinogen II   | 22.5 ± 7.2                | 17.2 ± 8.5           | 0.272          |
| Pepsinogen I/II | 3.8 ± 2.4                 | 2.4 ± 1.3            | 0.246          |
| Gastrin         | 38.9 ± 15.1               | 20.7 ± 9.6           | 0.032          |

CLO, *Campylobacter*-like organism; Hp, *Helicobacter pylori*; IgG, Immunoglobulin G; AMD, moderately differentiated adenocarcinoma; AWD, well-differentiated adenocarcinoma; HGD, high-grade dysplasia; LGD, low-grade dysplasia.

**Supplementary table 2.** Metadata for 15 donors\* for 1-month gastric tissue transplantation.

|                 | CSG<br>(n = 5) | IM<br>(n = 5) | GC<br>(n = 5) | <i>P</i> value |
|-----------------|----------------|---------------|---------------|----------------|
| Age, years      | 59.8 ± 5.9     | 49.2 ± 9.5    | 66.8 ± 8.7    | 0.017          |
| Gender          |                |               |               | 0.435          |
| male            | 1 (20.0%)      | 2 (40.0%)     | 3 (50.0%)     |                |
| female          | 4 (80.0%)      | 3 (60.0%)     | 2 (40.0%)     |                |
| CLO test        |                |               |               | 0.301          |
| negative        | 4 (80.0%)      | 2 (40.0%)     | 4 (80.0%)     |                |
| positive        | 1 (20.0%)      | 3 (60.0%)     | 1 (20.0%)     |                |
| Hp.IgG          |                |               |               | 0.153          |
| negative        | 4 (80.0%)      | 1 (20.0%)     | 3 (60.0%)     |                |
| positive        | 1 (20.0%)      | 4 (80.0%)     | 2 (40.0%)     |                |
| Pepsinogen I    | 47.5 ± 15.6    | 52.7 ± 14.9   | 48.8 ± 25.0   | 0.906          |
| Pepsinogen II   | 9.6 ± 2.1      | 21.0 ± 9.9    | 11.5 ± 4.7    | 0.272          |
| Pepsinogen I/II | 4.9 ± 0.7      | 2.9 ± 1.1     | 4.2 ± 0.7     | 0.008          |
| Gastrin         | 24.3 ± 11.5    | 53.8 ± 21.3   | 61.2 ± 90.2   | 0.537          |
| IM_tissue       |                |               |               | 0.092          |
| no              | 5 (100.0%)     | 2 (40.0%)     | 4 (80.0%)     |                |
| yes             | 0 (20.0%)      | 3 (60.0%)     | 1 (20.0%)     |                |

\*Donor cohort independent from Supplementary Tables 3 and 4.

CSG, chronic superficial gastritis; IM, intestinal metaplasia; GC, gastric cancer;

CLO, *Campylobacter*-like organism; Hp, *Helicobacter pylori*; IgG, Immunoglobulin G.

**Supplementary table 3.** Metadata for 12 donors\* for 1-month gastric fluid transplantation

|                 | CSG<br>(n = 4) | IM<br>(n = 4) | GC<br>(n = 4) | <i>P</i> value |
|-----------------|----------------|---------------|---------------|----------------|
| Age, years      | 52.8 ± 10.9    | 66.2 ± 8.8    | 61.5 ± 15.3   | 0.317          |
| Gender          |                |               |               | 0.368          |
| male            | 1 (25.0%)      | 3 (75.0%)     | 2 (50.0%)     |                |
| female          | 3 (75.0%)      | 1 (25.0%)     | 2 (50.0%)     |                |
| CLO test        |                |               |               | 0.264          |
| negative        | 0 ( 0.0%)      | 1 (25.0%)     | 2 (50.0%)     |                |
| positive        | 4 (100.0%)     | 3 (75.0%)     | 2 (50.0%)     |                |
| Hp.IgG          |                |               |               | 0.264          |
| negative        | 1 (25.0%)      | 0 ( 0.0%)     | 2 (50.0%)     |                |
| positive        | 3 (75.0%)      | 4 (100.0%)    | 2 (50.0%)     |                |
| Pepsinogen I    | 65.9 ± 27.2    | 96.9 ± 49.4   | 52.2 ± 27.2   | 0.253          |
| Pepsinogen II   | 23.1 ± 14.1    | 41.9 ± 33.5   | 15.4 ± 6.4    | 0.248          |
| Pepsinogen I/II | 3.3 ± 1.1      | 2.9 ± 1.3     | 3.6 ± 1.5     | 0.777          |
| IM_tissue       |                |               |               | 0.012          |
| no              | 4 (100.0%)     | 0 ( 0.0%)     | 1 (25.0%)     |                |
| yes             | 0 ( 0.0%)      | 4 (100.0%)    | 3 (75.0%)     |                |

\*Donor cohort independent from Supplementary Tables 2 and 4.

CSG, chronic superficial gastritis; IM, intestinal metaplasia; GC, gastric cancer;

CLO, *Campylobacter*-like organism; Hp, *Helicobacter pylori*; IgG, Immunoglobulin G.

Supplementary table 4. Metadata for 8 donors\* and 16 recipients for long-term (1 year) gastric tissue transplantation

| Donor information |            |        |          |          |              |               |                 |         |           | Recipient information |                                            |            |           |                                          |
|-------------------|------------|--------|----------|----------|--------------|---------------|-----------------|---------|-----------|-----------------------|--------------------------------------------|------------|-----------|------------------------------------------|
| Donor index       | Age, years | Gender | CLO test | Hp.IgG   | Pepsinogen I | Pepsinogen II | Pepsinogen I/II | Gastrin | IM_tissue | Recipient index       | Inoculated donor's gastric tissue location | Metaplasia | Dysplasia | 16S rRNA gene sequencing (antrum/corpus) |
| CSG_1             | 61         | F      | Positive | Positive | 100.9        | 35.9          | 2.8             | 25.0    | No        | CSG_1A                | Antrum                                     |            |           | o/o                                      |
| CSG_2             | 49         | F      | Positive | Negative | 42.8         | 9.1           | 4.7             | 12.0    | No        | CSG_1B                | Corpus                                     |            |           | o / failed <sup>b</sup>                  |
|                   |            |        |          |          |              |               |                 |         |           | CSG_1C                | Antrum                                     |            |           | o/o                                      |
|                   |            |        |          |          |              |               |                 |         |           | CSG_1D                | Corpus                                     |            |           | o/o                                      |
|                   |            |        |          |          |              |               |                 |         |           | CSG_1E                | Antrum                                     |            |           | o/o                                      |
| CSG_3             | 62         | F      | Positive | Positive | 73.9         | 34.6          | 2.1             | 42.6    | No        | CSG_1F                | Corpus                                     | o          | o         | o/o                                      |
| IM_1              | 60         | M      | Negative | Positive | 57.1         | 11.9          | 4.8             | 21.6    | Yes       | IM_2A                 | Antrum                                     | o          | o         | o/o                                      |
| IM_2              | 78         | F      | Positive | Positive | 160.5        | 88.6          | 1.8             | 65.9    | Yes       | IM_2B                 | Corpus                                     | o          |           | o/o                                      |
|                   |            |        |          |          |              |               |                 |         |           | IM_2C                 | Antrum                                     |            | o         | o/o                                      |
|                   |            |        |          |          |              |               |                 |         |           | IM_2D <sup>a</sup>    | Corpus                                     |            | -         | -                                        |
| GC_1              | 69         | F      | Negative | Negative | 37.3         | 7.7           | 4.8             | 33.1    | Yes       | GC_3A                 | Antrum                                     |            |           | o / failed <sup>b</sup>                  |
| GC_2              | 75         | F      | Negative | Negative | 90.3         | 18.2          | 5.0             | 222.0   | No        | GC_3B                 | Corpus                                     |            | o         | o / failed <sup>b</sup>                  |
|                   |            |        |          |          |              |               |                 |         |           | GC_3C                 | Antrum                                     | o          |           | o / failed <sup>b</sup>                  |
|                   |            |        |          |          |              |               |                 |         |           | GC_3D                 | Corpus                                     |            |           | o/o                                      |
| GC_3              | 40         | M      | Positive | Positive | 29           | 13.2          | 2.2             | 29.1    | Yes       | GC_3E                 | Antrum                                     | o          | o         | o/o                                      |
|                   |            |        |          |          |              |               |                 |         |           | GC_3F                 | Corpus                                     | o          | o         | o/o                                      |

\*Donor cohort independent from Supplementary Tables 2 and 3.

<sup>a</sup>This subject died 7 months after GMT.

<sup>b</sup>16S rRNA gene sequencing was not conducted since the sequencing library construction failed.

CSG, chronic superficial gastritis; IM, intestinal metaplasia; GC, gastric cancer;  
CLO, *Campylobacter*-like organism; Hp, *Helicobacter pylori*; IgG, Immunoglobulin G.
